# Supplementary material
Source: PubMed Central journal article supplement (PMC2705606)
Supplement: 0810319106_0810319106SI.pdf [file 0810319106_0810319106SI.pdf]

# Supporting Information

Yamauchi et al. 10.1073/pnas.0810319106

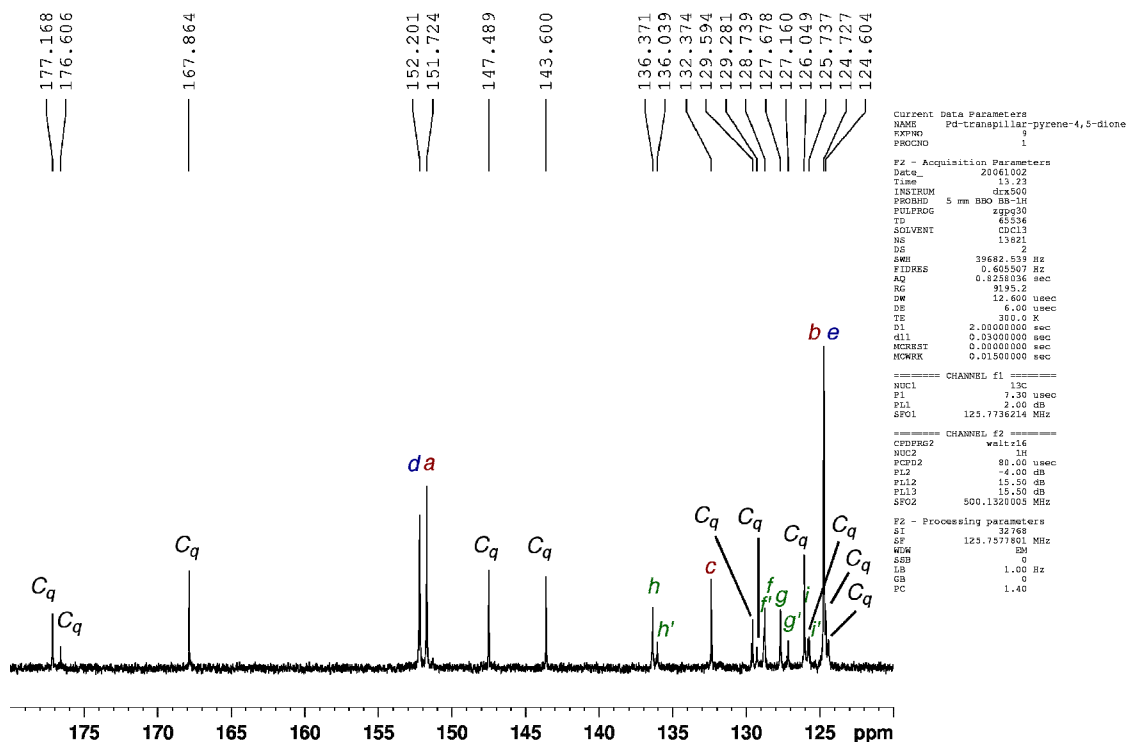

Fig. S1. The  $^{13}\text{C}\{^1\text{H}\}$  NMR (500 MHz,  $\text{D}_2\text{O}$ , 300 K) spectrum of  $2\text{D}(1)_3$ .

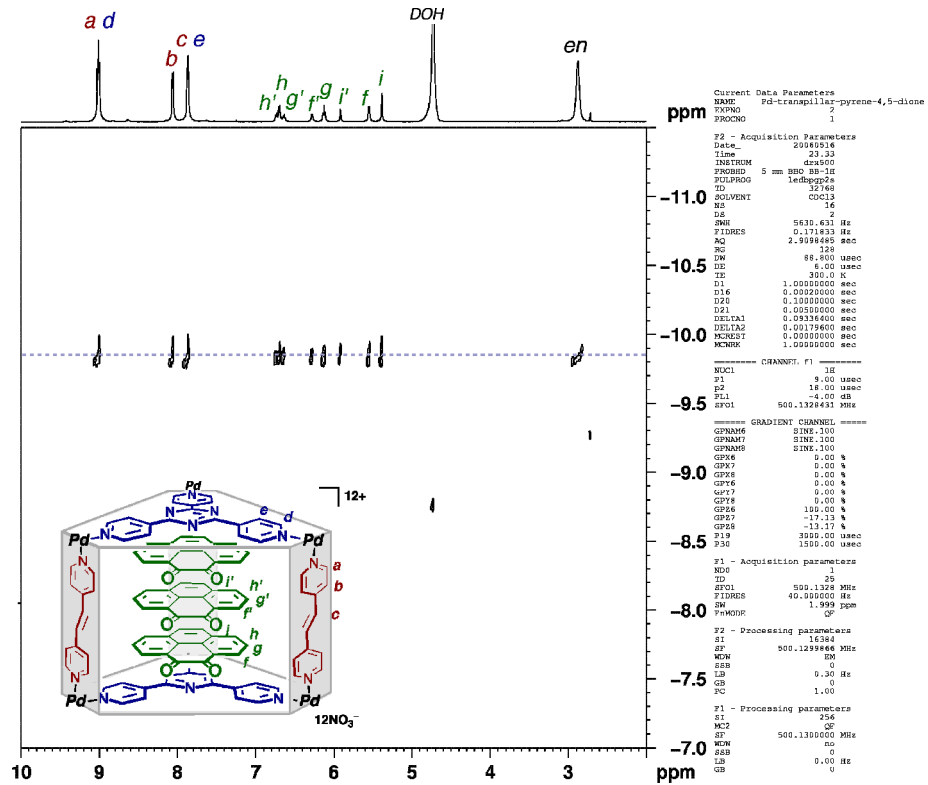

Fig. S2. The  $^1\text{H}$  DOSY NMR (500 MHz,  $\text{D}_2\text{O}$ , 300 K) spectrum of  $2\text{D}(1)_3$ .

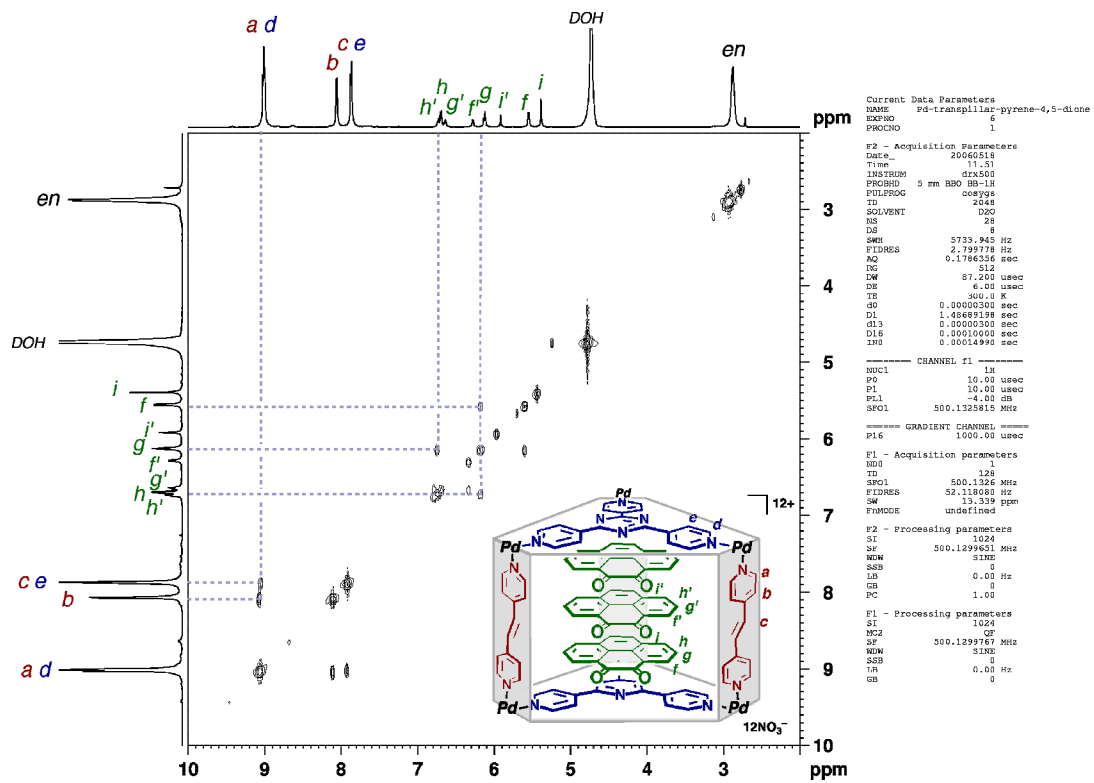

Fig. S3. The  $^1\text{H}$ - $^1\text{H}$  COSY (500 MHz,  $\text{D}_2\text{O}$ , 300 K) spectrum of  $2\text{Pd}(1)_3$ .

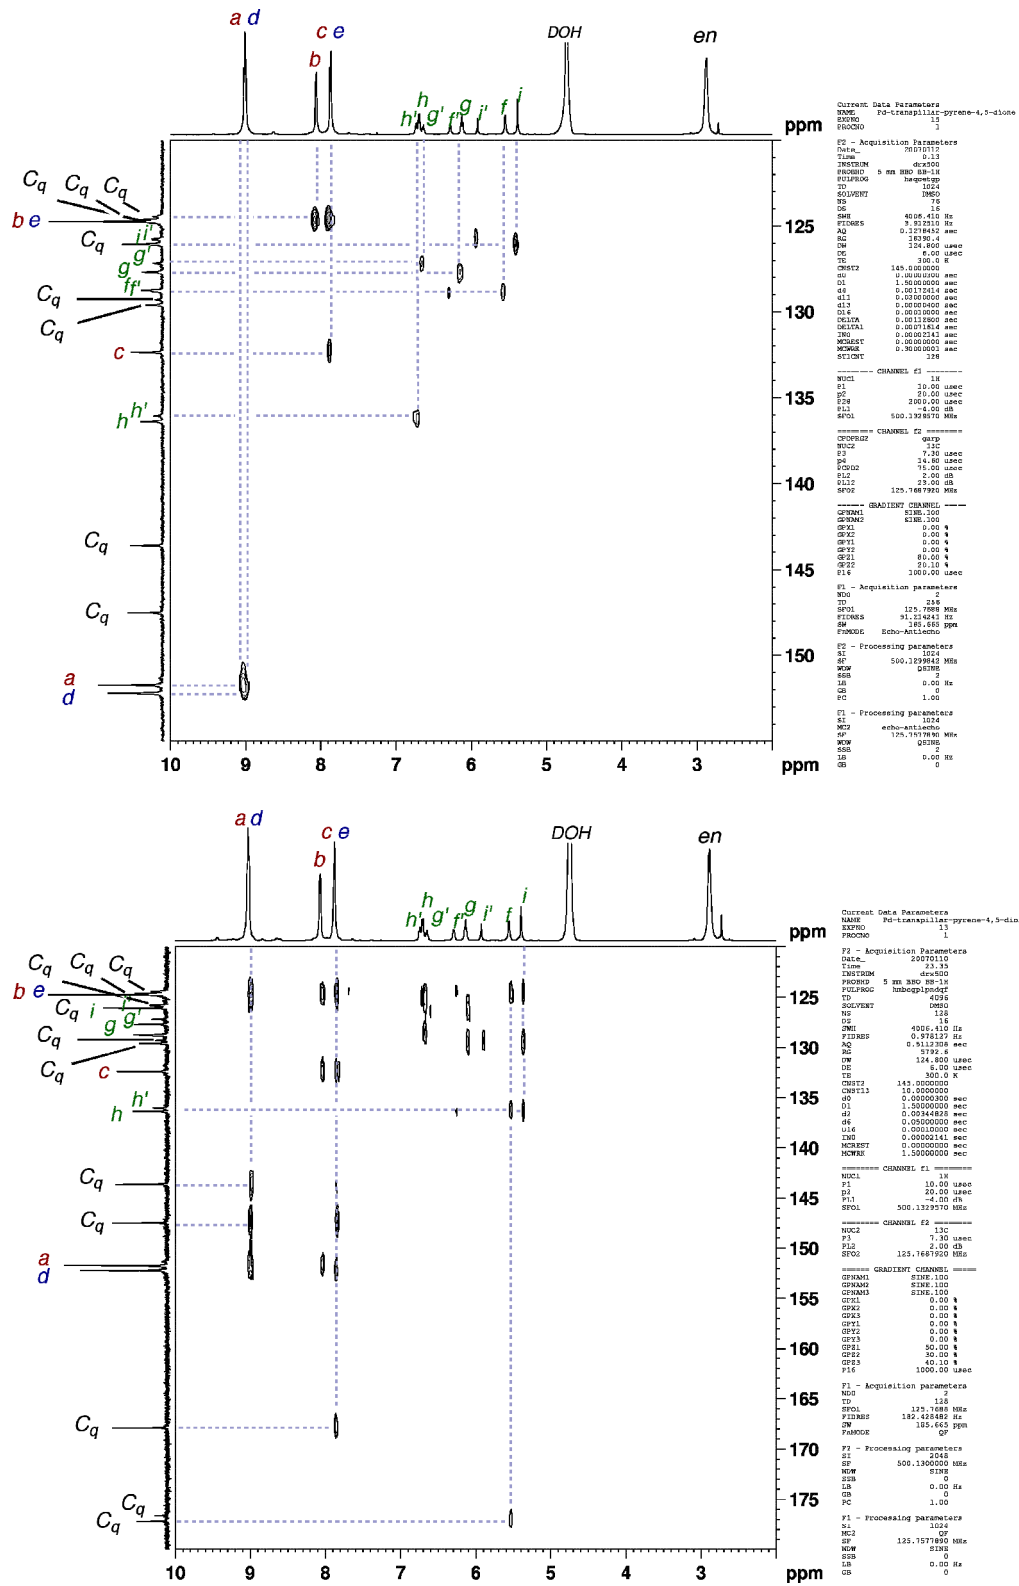

Fig. S4. The  $^1\text{H}$ - $^{13}\text{C}$  HSQC and HMBC (500 MHz,  $\text{D}_2\text{O}$ , 300 K) spectrum of  $2\text{D}(1)_3$ .

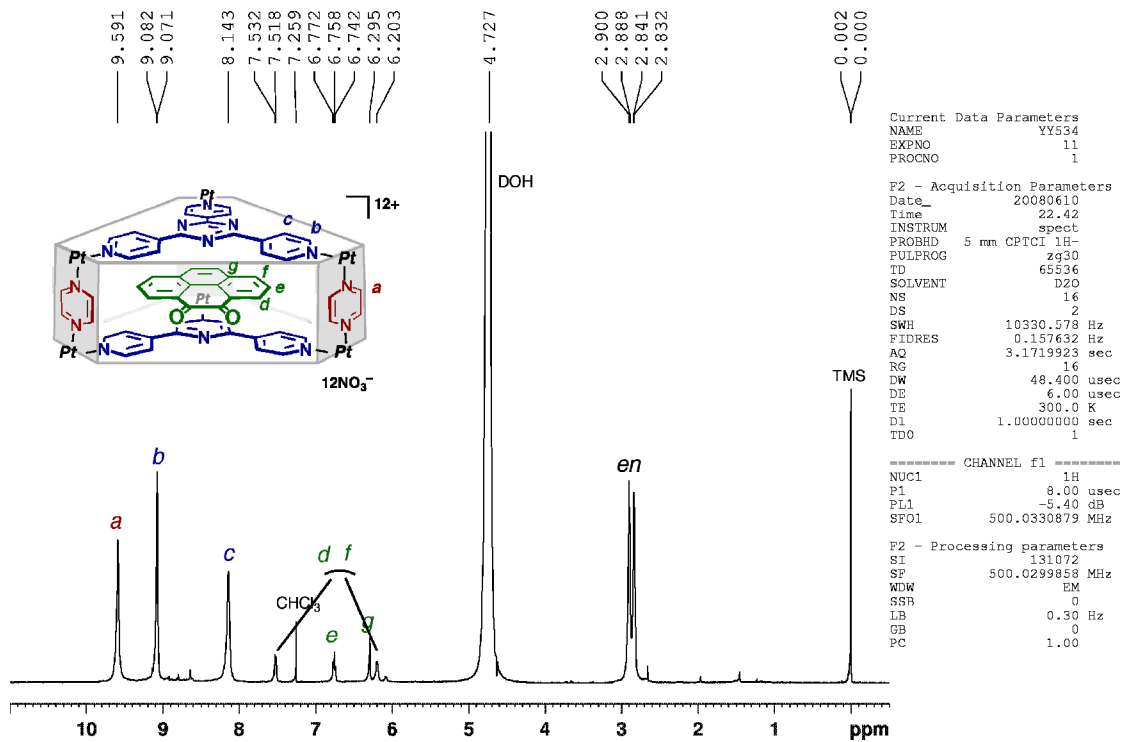

Fig. S5. The <sup>1</sup>H NMR (500 MHz, D<sub>2</sub>O, 300 K) spectrum of 6-1.

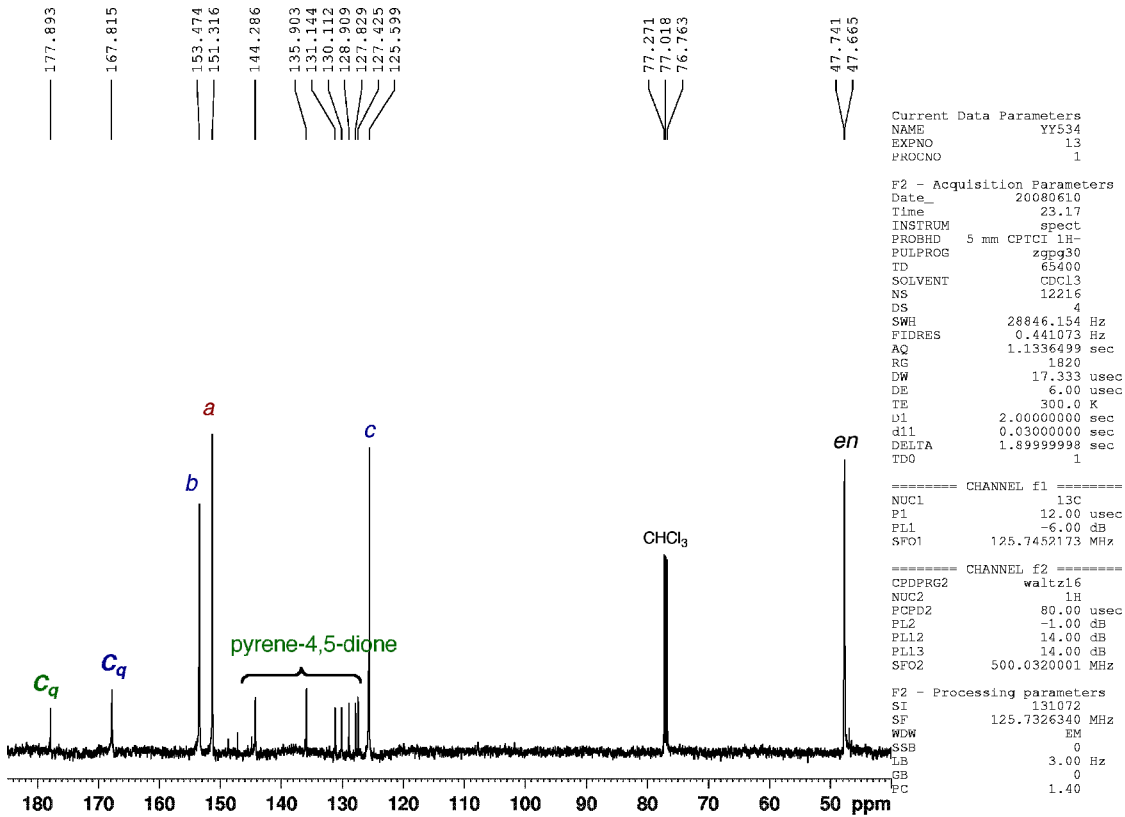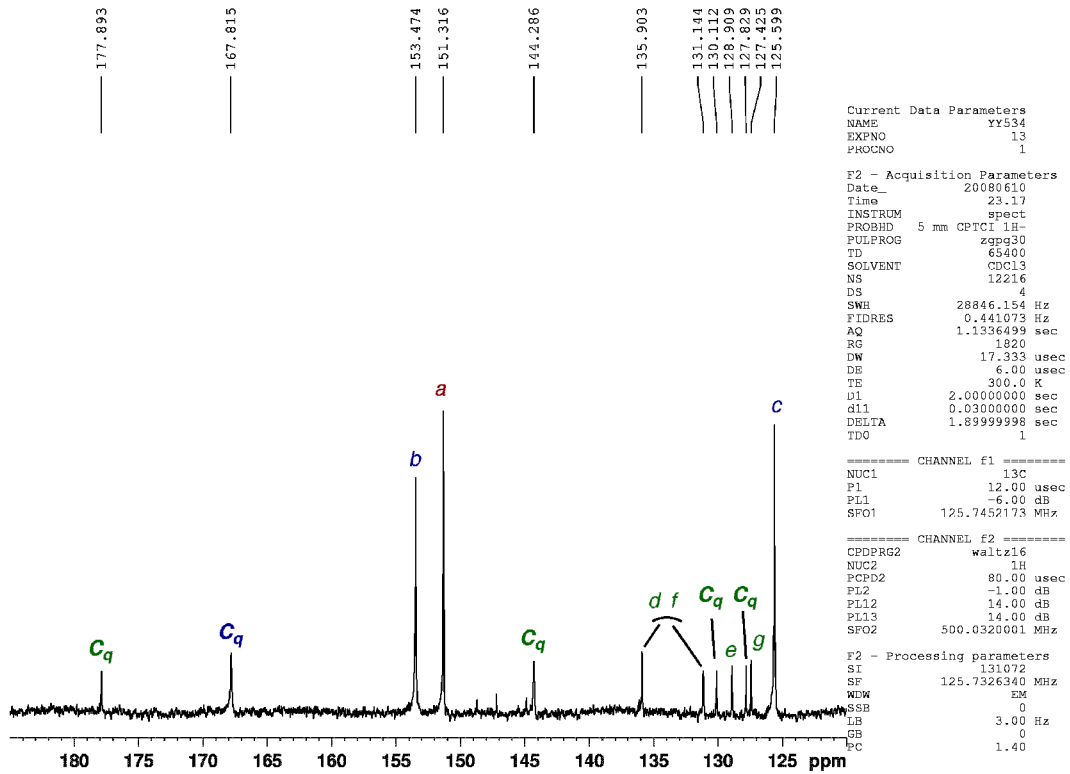

Fig. S6. The  $^{13}\text{C}\{^1\text{H}\}$  NMR (500 MHz,  $\text{D}_2\text{O}$ , 300 K) spectrum of  $6\text{D}1$ .

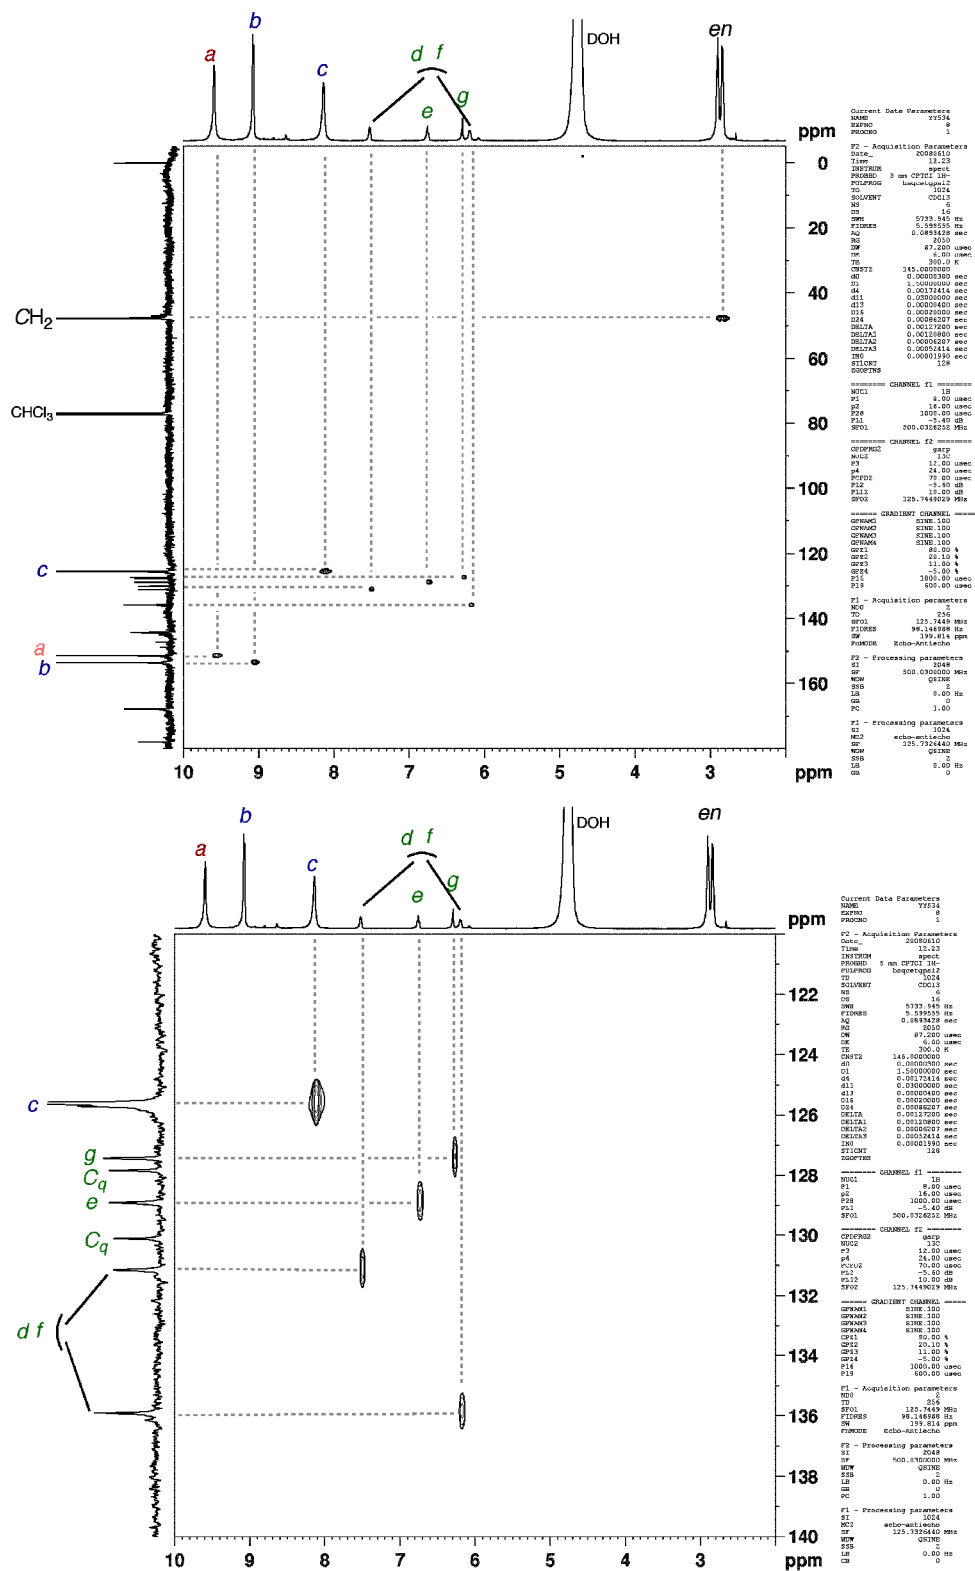

Fig. S7. The <sup>1</sup>H-<sup>13</sup>C HSQC (500 MHz, D<sub>2</sub>O, 300 K) spectrum of 6D1.

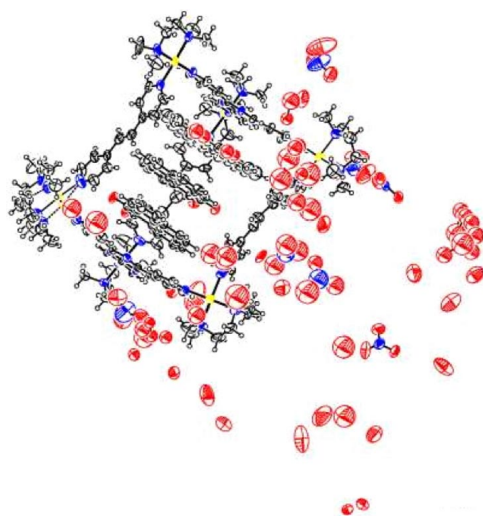

Fig. S8. ORTEP drawing of 2'-(1)3 (50% probability ellipsoids).



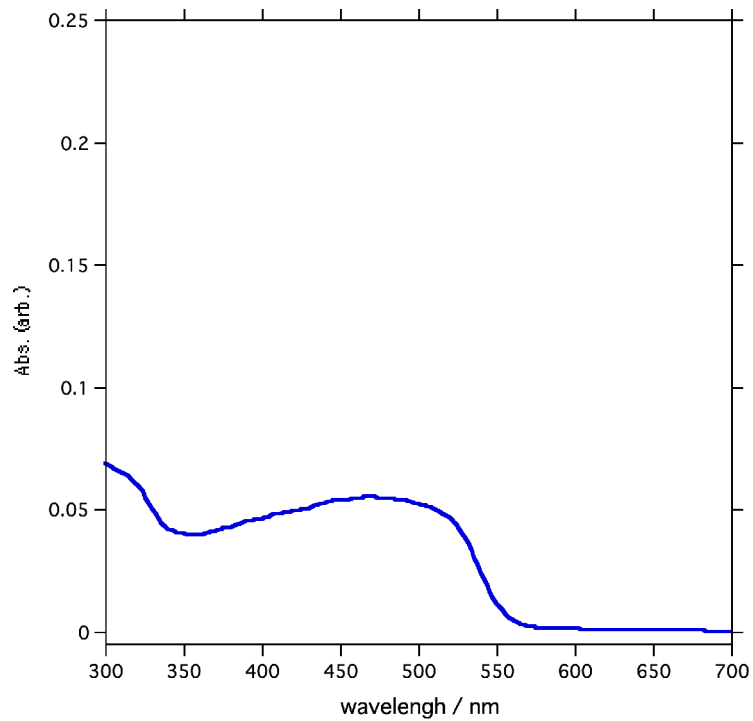

Fig. S9. UV-vis spectrum of 1 in solid.

## Other Supporting Information Files

[Table S1](#)

[Table S2](#)

[Table S3](#)

[Table S4](#)
